# Supplementary material for: Formation of mononuclear N,O-chelate zirconium complexes by direct insertion of epoxide into tetrakis(dimethylamido)zirconium: highly promising approach for developing an ALD precursor of ZrO2 thin films
Source: Royal Society of Chemistry journal article supplement (doi:10.1039/d1dt04207f), 2022-01-01
Supplement: d1dt04207f1.pdf [file d1dt04207f1.pdf]

**Formation of Novel Mononuclear N,O-chelate Zirconium Complexes  
by Direct Insertion of Epoxide into  
Tetrakis(dimethylamido)zirconium: Highly Promising Approach for  
Developing ALD Precursor of ZrO<sub>2</sub> Thin Film**

Jianwei Jiang,<sup>a</sup> Sohee Choi,<sup>a</sup> Jaehyun Oh,<sup>b</sup> Jihyun Choi,<sup>a</sup> Ho-Jung Sun,<sup>b</sup> and Sungho Yoon\*<sup>a</sup>

**Supporting Information**

## Coates and our previous work

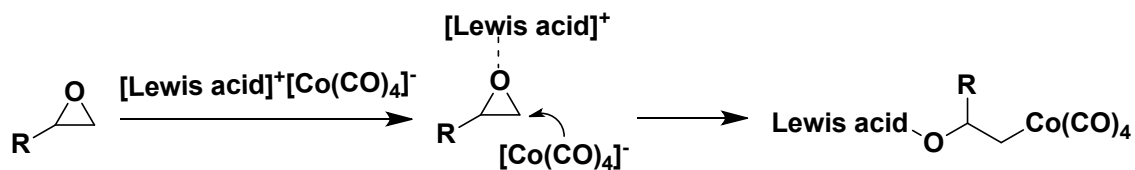

## Our inspiration

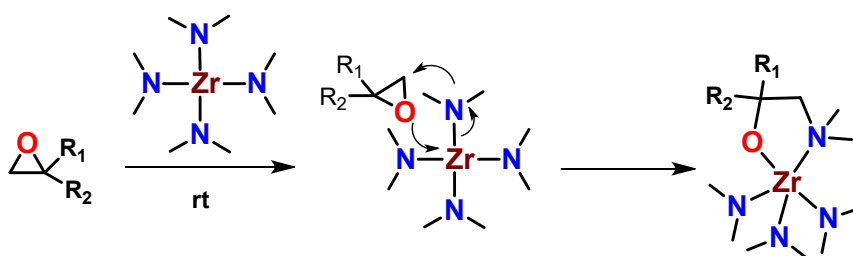

**Scheme S1** Proposed mechanism for the formation of N,O-chelate Zr complex.

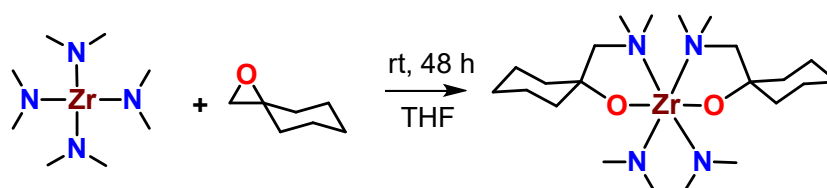

**Scheme S2** Synthetic procedure of complex 1.

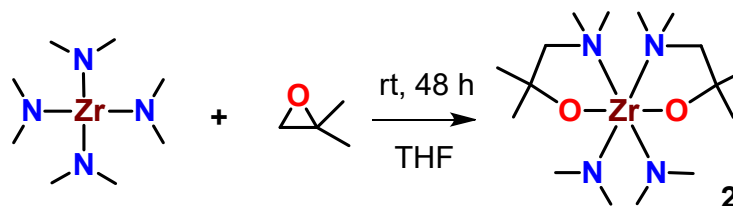

**Scheme S3** Synthetic procedure of complex 2.

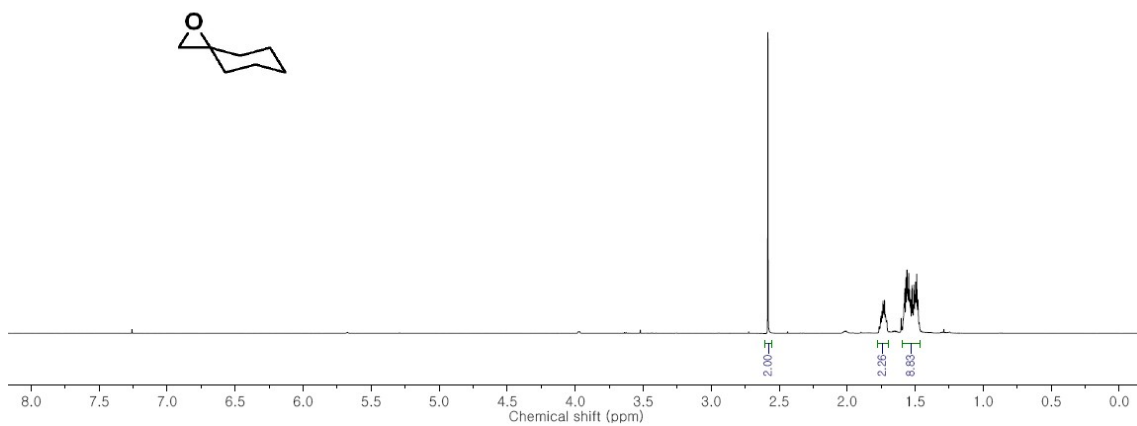

**Fig. S1** <sup>1</sup>H NMR spectrum of MCO in CDCl<sub>3</sub>.

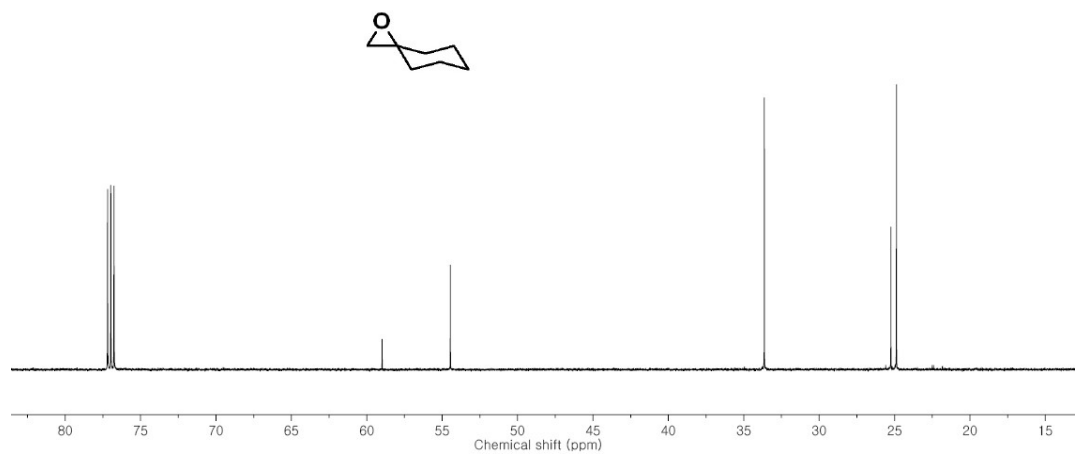

**Fig. S2** <sup>13</sup>C NMR spectrum of MCO in CDCl<sub>3</sub>.

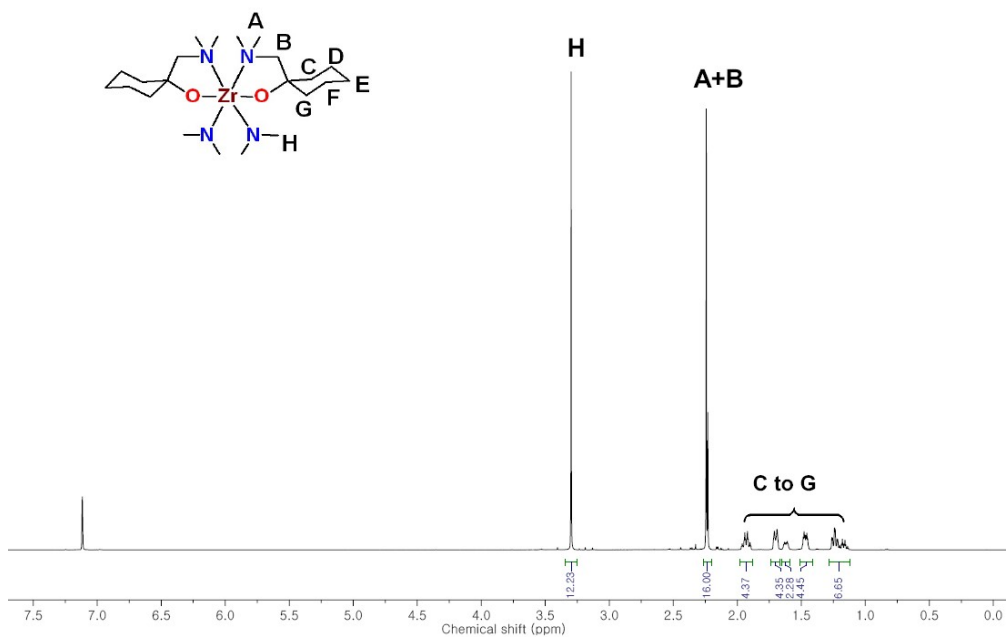

**Fig. S3**  $^1\text{H}$  NMR spectrum of complex 1 in  $\text{C}_6\text{D}_6$ .

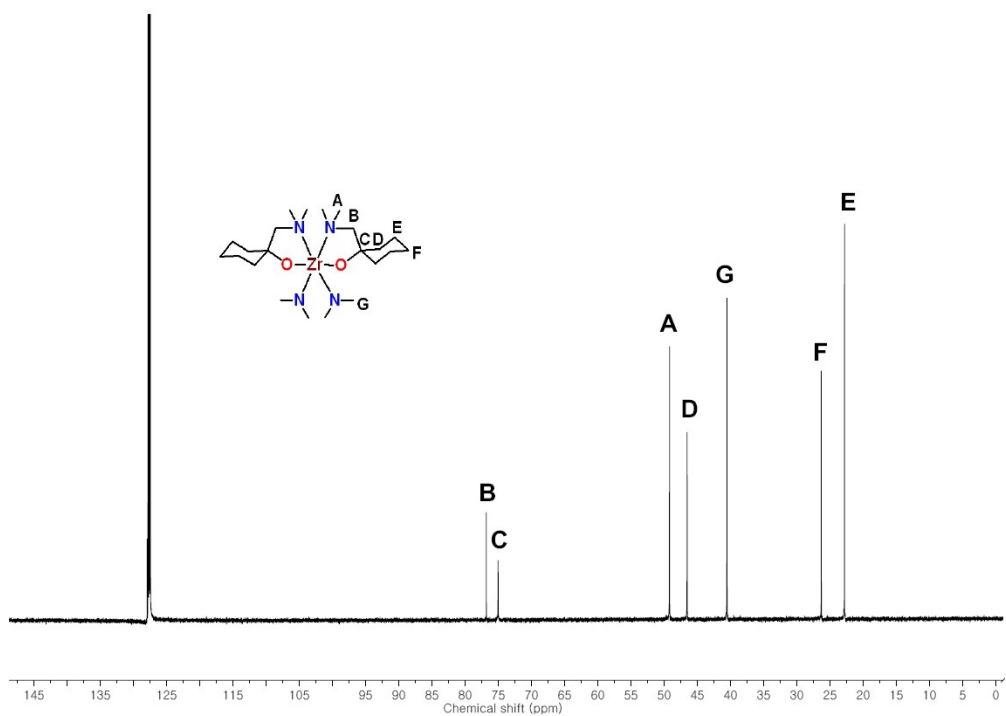

**Fig. S4**  $^{13}\text{C}$  NMR spectrum of complex 1 in  $\text{C}_6\text{D}_6$ .

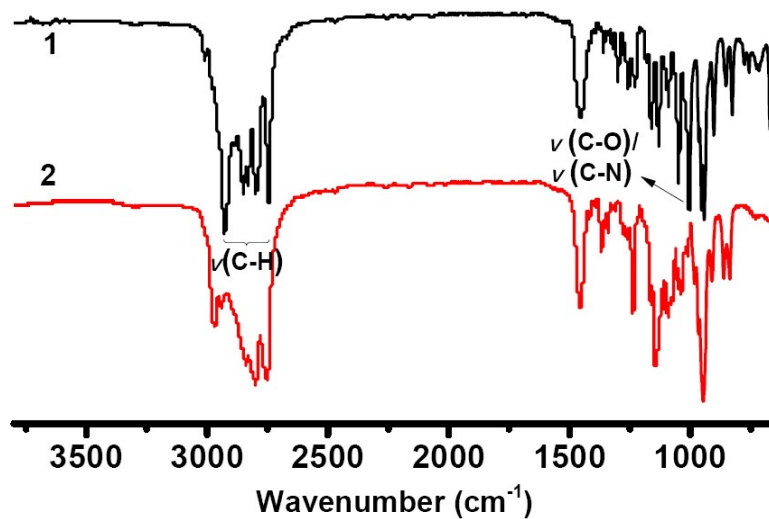

Fig. S5 FTIR spectra of complex 1 and complex 2.

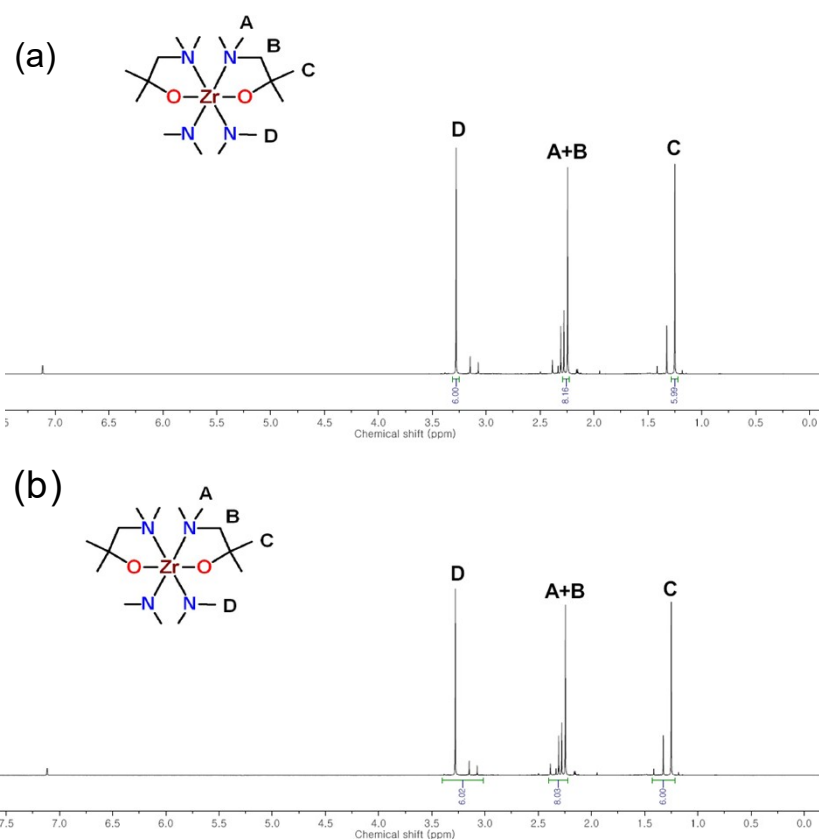

Fig. S6  $^1\text{H}$  NMR spectrum of complex 2 in  $\text{C}_6\text{D}_6$ . (a) Integration area of one set of peaks (b) Integration area of several sets of peaks.

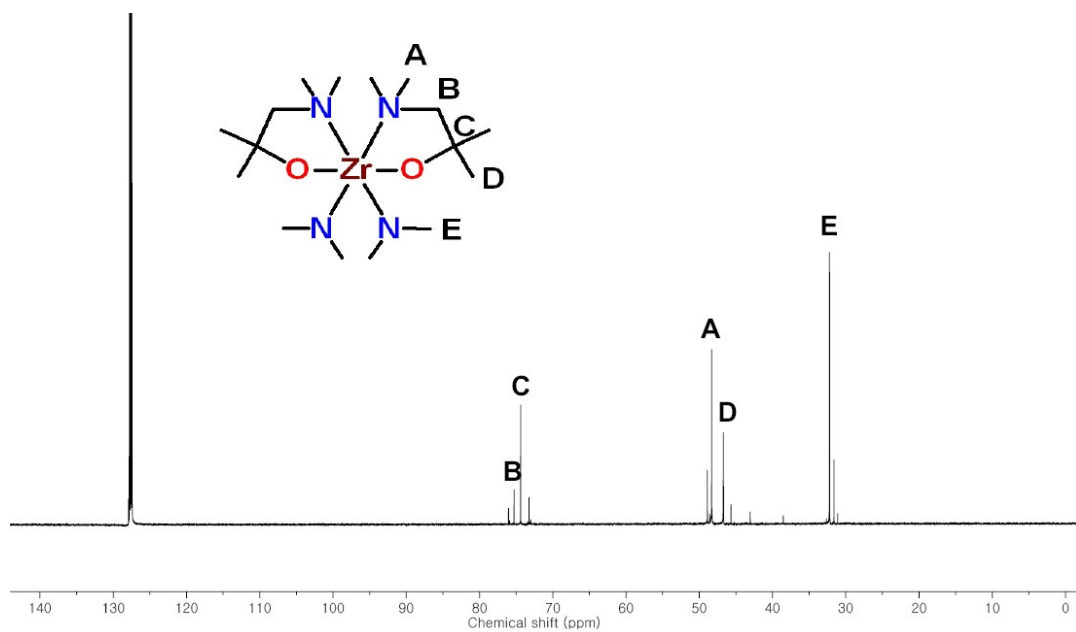

**Fig. S7**  $^{13}\text{C}$  NMR spectrum of complex **2** in  $\text{C}_6\text{D}_6$ .

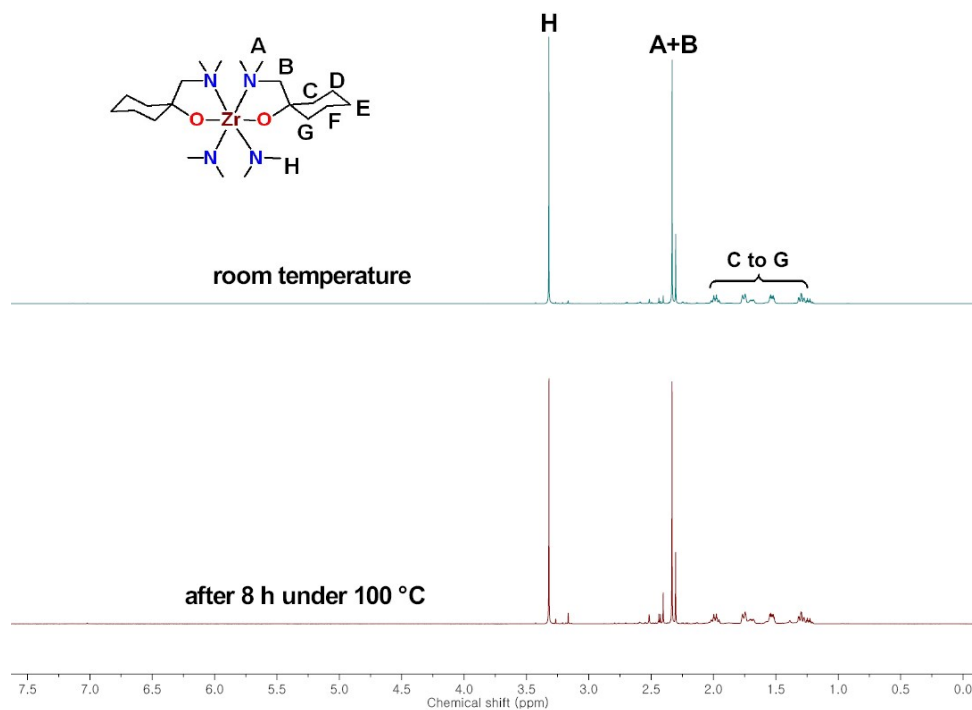

**Fig. S8**  $^1\text{H}$  NMR spectra of complex **1** before and after heating in toluene- $\text{d}_8$  under  $100\text{ }^\circ\text{C}$  for 8 h.

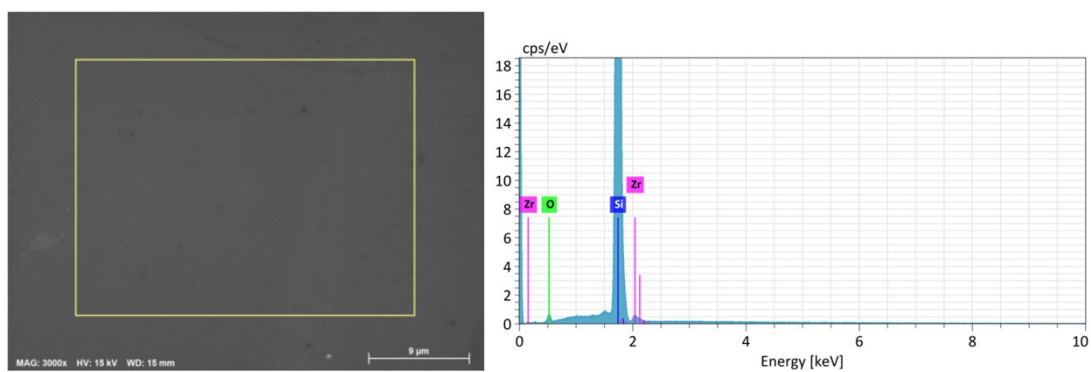

**Fig. S9** The plan-view SEM and EDX images of the film prepared using **1**.

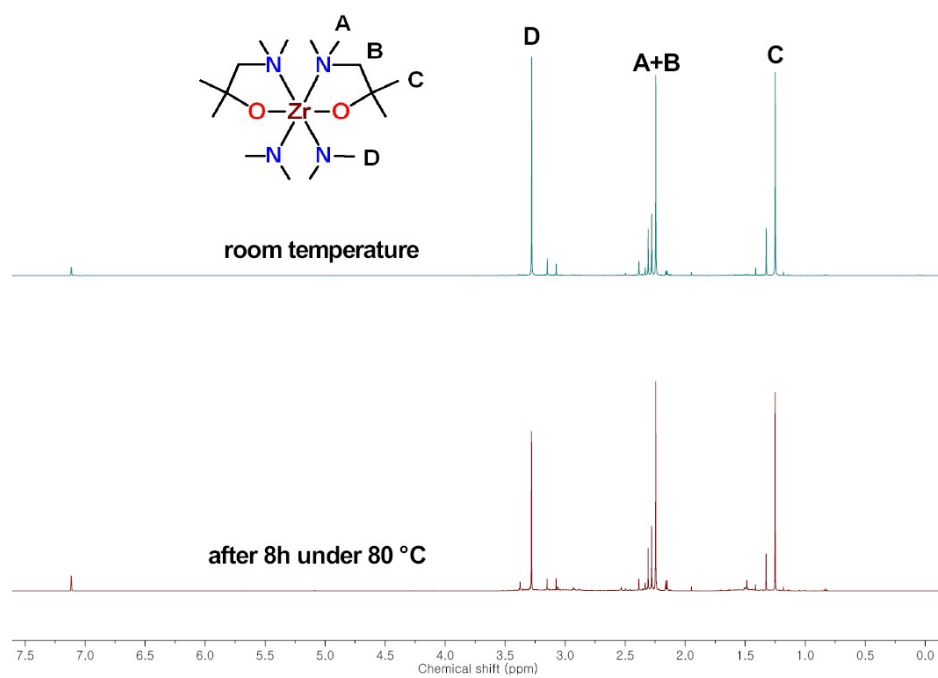

**Fig. S10**  $^1\text{H}$  NMR spectra of complex **2** before and after heating in toluene- $d_8$  under 80 °C for 8 h.

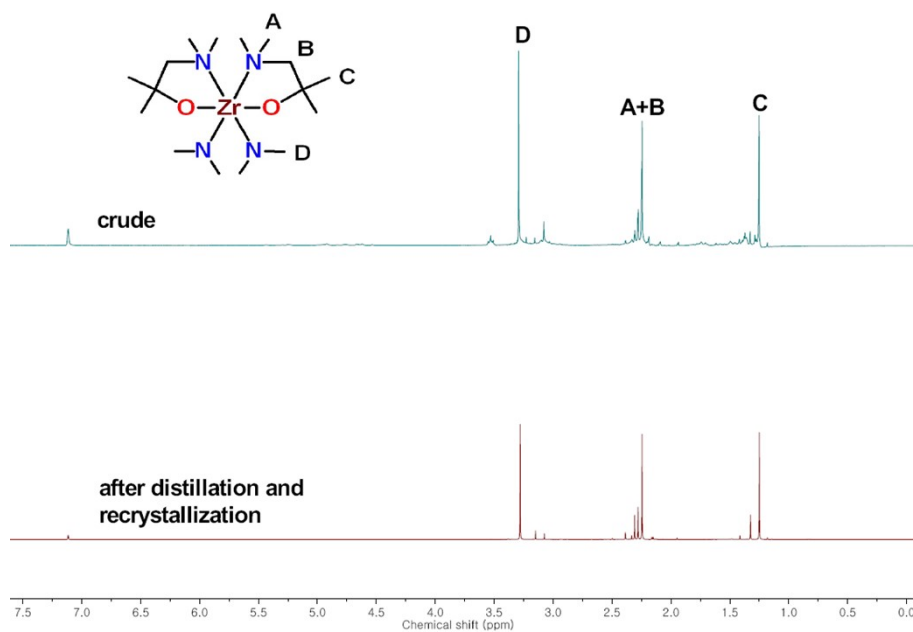

**Fig. S11**  $^1\text{H}$  NMR spectra of complex **2** before and after purification.

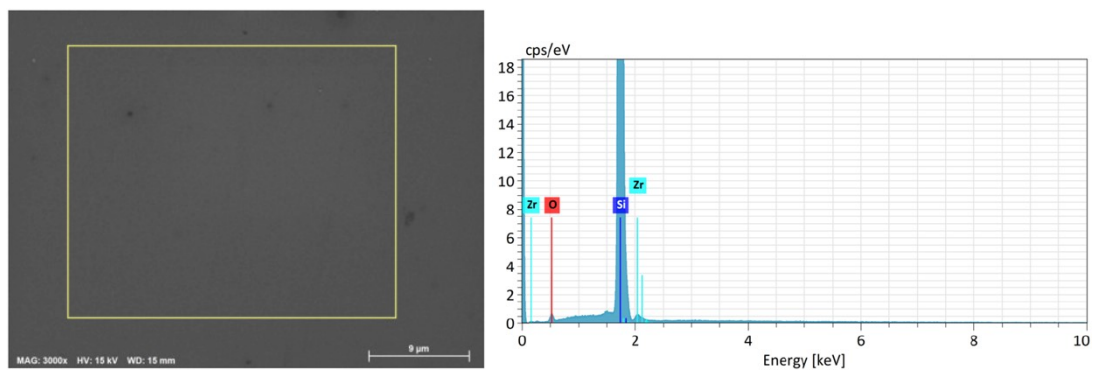

**Fig. S12** The plan-view SEM and EDX images of the film prepared using **2**.



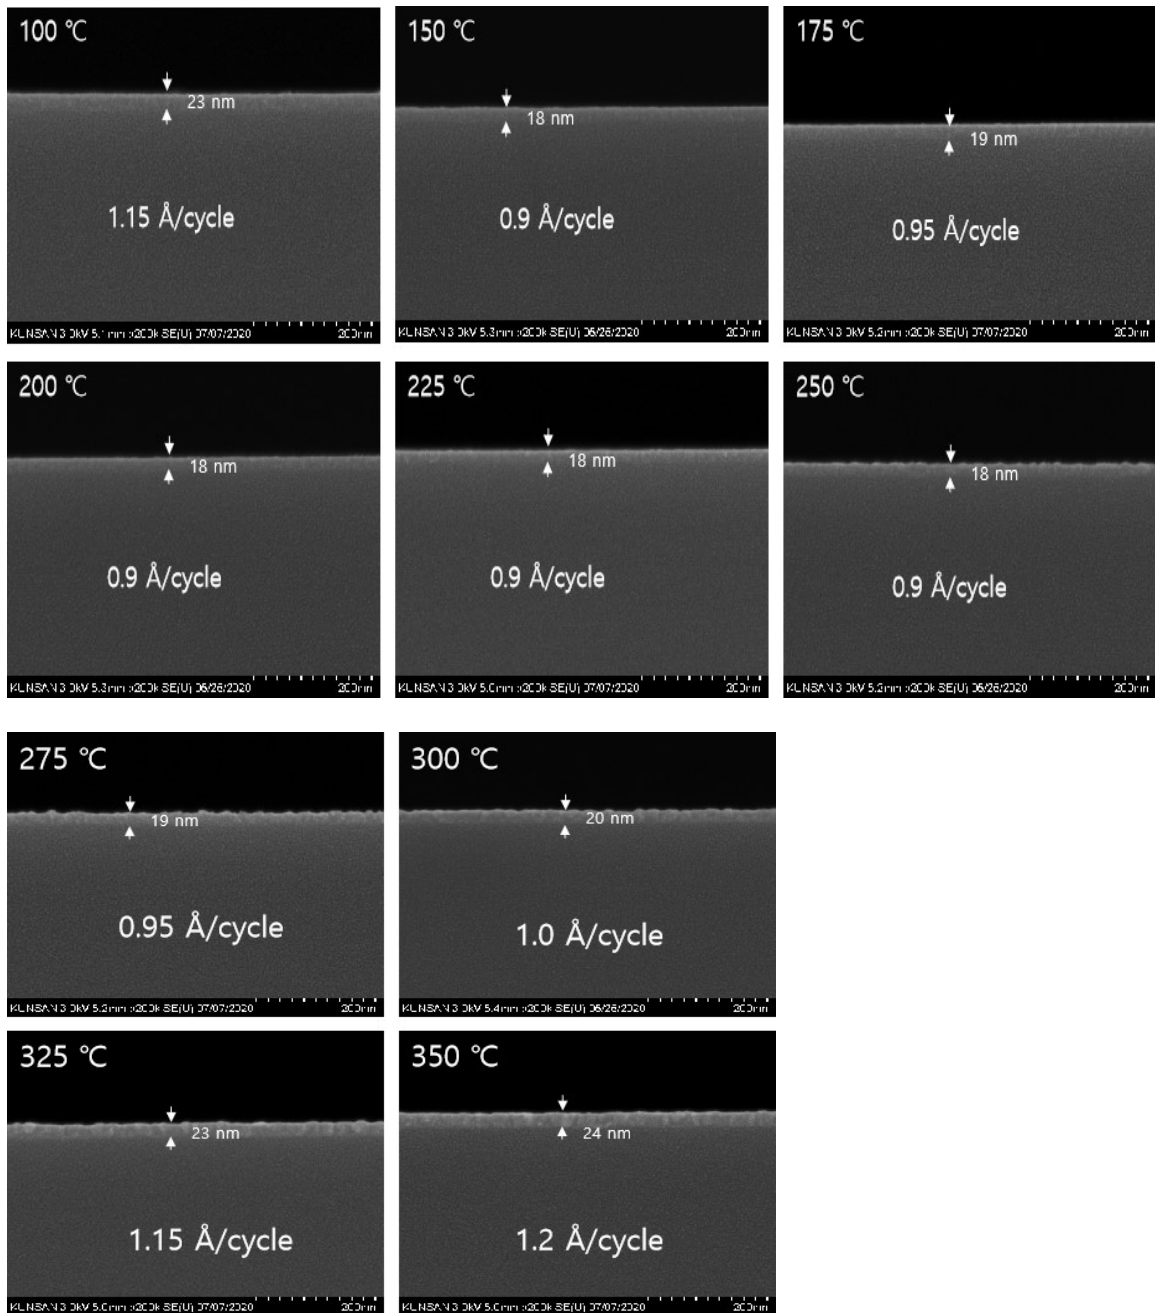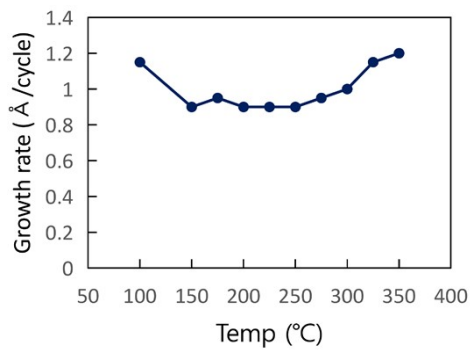

**Fig. S13-1** Cross-sectional SEM images of ZrO<sub>2</sub> thin film deposited using standard CpZr(NMe<sub>2</sub>)<sub>3</sub> precursor and O<sub>3</sub> on silicon at various temperatures through 200 cycles. (Bottom) The growth rate of ZrO<sub>2</sub> thin film as a function of temperature.

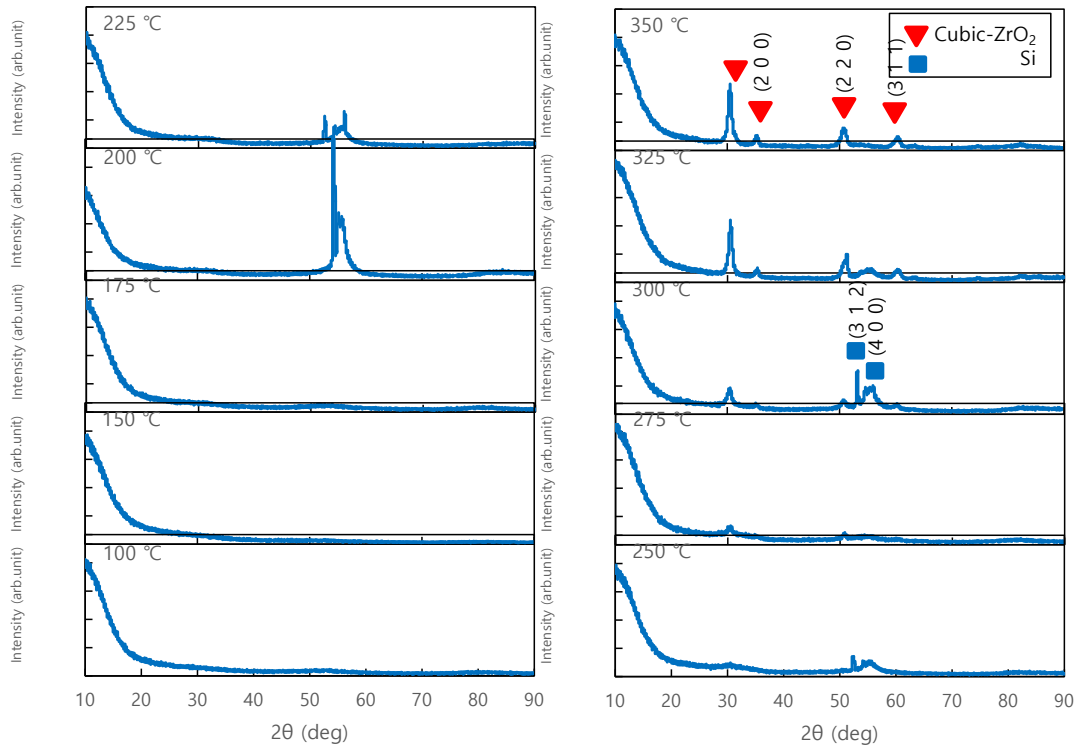

**Fig. S13-2** XRD images of ZrO<sub>2</sub> thin film deposited using CpZr(NMe<sub>2</sub>)<sub>3</sub> and O<sub>3</sub> on silicon at various temperatures through 200 cycles.

**Table S1** Summary of X-ray Crystallographic data.

| Compound                          | [(Me <sub>2</sub> N) <sub>2</sub> Zr(OC(C <sub>5</sub> H <sub>10</sub> )CH <sub>2</sub> NMe <sub>2</sub> ) <sub>2</sub> ] | [(Me <sub>2</sub> N) <sub>2</sub> Zr(OCMe <sub>2</sub> CH <sub>2</sub> NMe <sub>2</sub> ) <sub>2</sub> ]           |
|-----------------------------------|---------------------------------------------------------------------------------------------------------------------------|--------------------------------------------------------------------------------------------------------------------|
|                                   | (complex 1)                                                                                                               | (complex 2)                                                                                                        |
| Empirical formula                 | ZrO <sub>2</sub> N <sub>4</sub> C <sub>22</sub> H <sub>48</sub>                                                           | ZrO <sub>2</sub> N <sub>4</sub> C <sub>16</sub> H <sub>40</sub>                                                    |
| Formula weight                    | 491.86                                                                                                                    | 413.75                                                                                                             |
| Temperature                       | 193(2) K                                                                                                                  | 293(2) K                                                                                                           |
| Wavelength                        | 1.54178 Å                                                                                                                 | 1.54184 Å                                                                                                          |
| Crystal system                    | Monoclinic                                                                                                                | Triclinic                                                                                                          |
| Space group                       | P2 <sub>1</sub> /c                                                                                                        | P-1                                                                                                                |
| Unit cell dimensions              | a = 15.9734(3) Å<br>α = 90°<br>b = 9.57200(19) Å<br>β = 91.5782(16)°<br>c = 16.6128(3) Å<br>γ = 90°                       | a = 8.8032(2) Å<br>α = 75.6210(10)°<br>b = 9.05680(10) Å<br>β = 86.3200(10)°<br>c = 15.4925(2) Å<br>γ = 65.266(2)° |
| Volume                            | 2539.09(8) Å <sup>3</sup>                                                                                                 | 1085.63(3) Å <sup>3</sup>                                                                                          |
| Z                                 | 4                                                                                                                         | 2                                                                                                                  |
| Density (calculated)              | 1.287 Mg/m <sup>3</sup>                                                                                                   | 1.266 Mg/m <sup>3</sup>                                                                                            |
| Absorption coefficient            | 3.719 mm <sup>-1</sup>                                                                                                    | 4.249 mm <sup>-1</sup>                                                                                             |
| F(000)                            | 1056                                                                                                                      | 444                                                                                                                |
| Crystal size                      | 0.133 x 0.067 x 0.054 mm <sup>3</sup>                                                                                     | 0.235 x 0.146 x 0.108 mm <sup>3</sup>                                                                              |
| Theta range for data collection   | 5.327 to 79.037°..                                                                                                        | 5.539 to 79.130°                                                                                                   |
| Index ranges                      | -20 ≤ h ≤ 19, -7 ≤ k ≤ 11,<br>-18 ≤ l ≤ 21                                                                                | -11 ≤ h ≤ 11, -11 ≤ k ≤ 11, -<br>19 ≤ l ≤ 15                                                                       |
| Reflections collected             | 20701                                                                                                                     | 14033                                                                                                              |
| Independent reflections           | 5328 [R(int) = 0.0331]                                                                                                    | 4560 [R(int) = 0.0455]                                                                                             |
| Refinement method                 | Full-matrix least-squares on F <sup>2</sup>                                                                               | Full-matrix least-squares on F <sup>2</sup>                                                                        |
| Goodness-of-fit on F <sup>2</sup> | 1.111                                                                                                                     | 1.147                                                                                                              |
| Final R indices                   | R1 = 0.0494, wR2 = 0.1307                                                                                                 | R1 = 0.0327, wR2 = 0.0893                                                                                          |
| [I > 2σ(I)]                       |                                                                                                                           |                                                                                                                    |
| R indices (all data)              | R1 = 0.0529, wR2 = 0.1322                                                                                                 | R1 = 0.0337, wR2 = 0.0899                                                                                          |

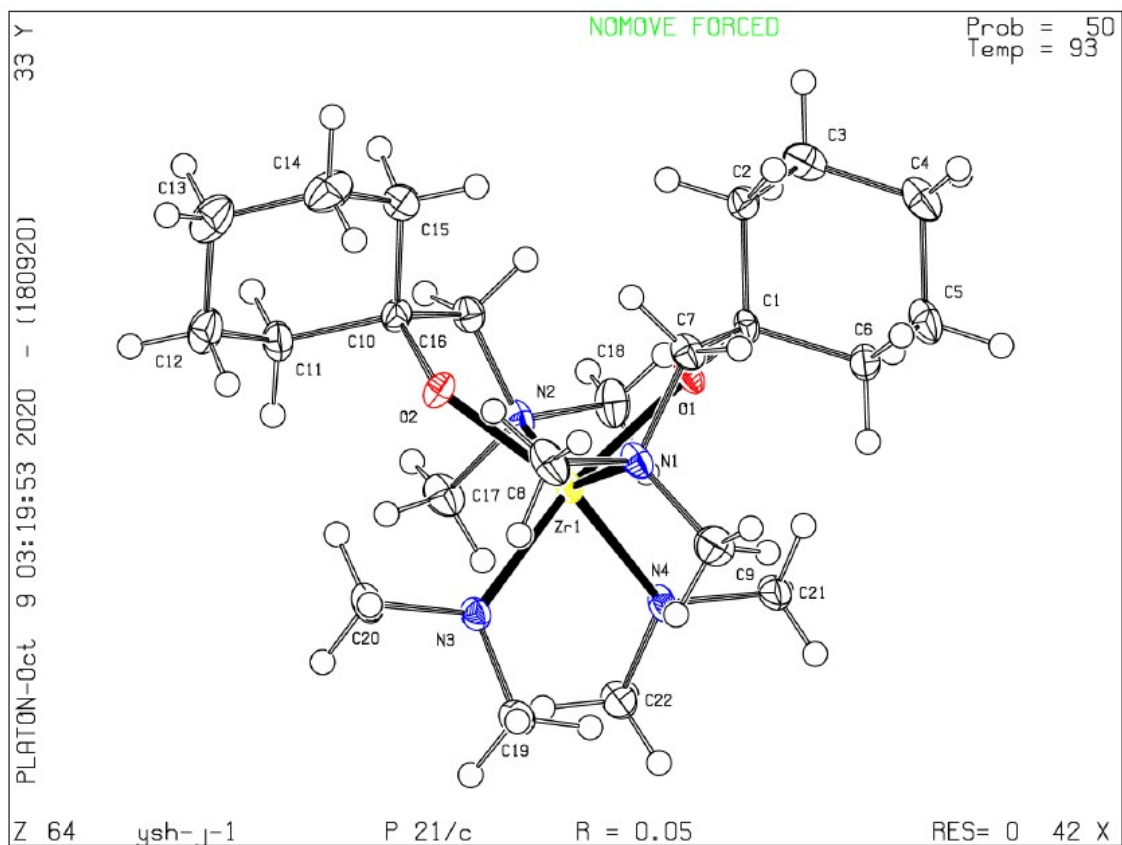

**Fig. S14** Structure of complex 1 ( $[(\text{Me}_2\text{N})_2\text{Zr}(\text{OC}(\text{C}_5\text{H}_{10})\text{CH}_2\text{NMe}_2)_2]$ )

**Table S2.** Selected Angles (deg) and Interatomic Distances (Å) for complex **1**  
 [(Me<sub>2</sub>N)<sub>2</sub>Zr(OC(C<sub>3</sub>H<sub>10</sub>)CH<sub>2</sub>NMe<sub>2</sub>)<sub>2</sub>]

| Bond angles and lengths |            |            |          |
|-------------------------|------------|------------|----------|
| O(2)-Zr(1)-O(1)         | 100.30(11) | Zr(1)-O(2) | 2.038(3) |
| O(2)-Zr(1)-N(4)         | 152.71(12) | Zr(1)-O(1) | 2.043(2) |
| O(1)-Zr(1)-N(4)         | 92.81(11)  | Zr(1)-N(4) | 2.117(3) |
| O(2)-Zr(1)-N(3)         | 87.81(11)  | Zr(1)-N(3) | 2.139(3) |
| O(1)-Zr(1)-N(3)         | 156.48(11) | Zr(1)-N(1) | 2.415(3) |
| N(4)-Zr(1)-N(3)         | 89.56(12)  | Zr(1)-N(2) | 2.437(3) |
| O(2)-Zr(1)-N(1)         | 95.62(11)  |            |          |
| O(1)-Zr(1)-N(1)         | 71.97(10)  |            |          |
| N(4)-Zr(1)-N(1)         | 111.23(12) |            |          |
| N(3)-Zr(1)-N(1)         | 85.37(11)  |            |          |
| O(2)-Zr(1)-N(2)         | 71.43(11)  |            |          |
| O(1)-Zr(1)-N(2)         | 84.98(10)  |            |          |
| N(4)-Zr(1)-N(2)         | 86.15(12)  |            |          |
| N(3)-Zr(1)-N(2)         | 118.53(11) |            |          |
| N(1)-Zr(1)-N(2)         | 151.31(11) |            |          |
| C(1)-O(1)-Zr(1)         | 129.8(2)   |            |          |
| C(9)-N(1)-Zr(1)         | 109.8(2)   |            |          |
| C(8)-N(1)-Zr(1)         | 112.2(2)   |            |          |
| C(7)-N(1)-Zr(1)         | 106.6(2)   |            |          |
| C(10)-O(2)-Zr(1)        | 129.4(2)   |            |          |
| C(16)-N(2)-Zr(1)        | 105.1(2)   |            |          |
| C(17)-N(2)-Zr(1)        | 109.3(2)   |            |          |
| C(18)-N(2)-Zr(1)        | 113.2(2)   |            |          |
| C(19)-N(3)-Zr(1)        | 125.5(2)   |            |          |
| C(20)-N(3)-Zr(1)        | 125.6(3)   |            |          |
| C(21)-N(4)-Zr(1)        | 125.8(2)   |            |          |
| C(22)-N(4)-Zr(1)        | 125.0(2)   |            |          |

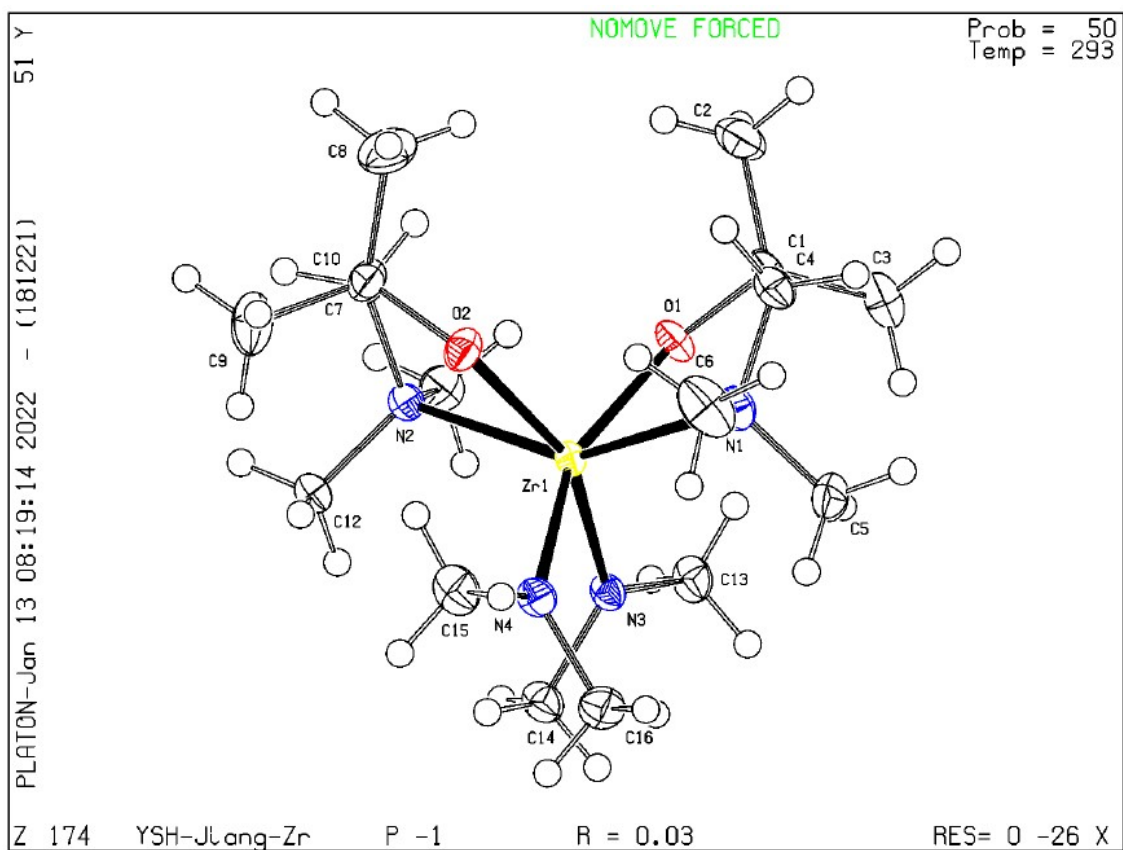

**Fig. S15** Structure of complex **2** ( $[(\text{Me}_2\text{N})_2\text{Zr}(\text{OCMe}_2\text{CH}_2\text{NMe}_2)_2]$ ).

**Table S3.** Selected Angles (deg) and Interatomic Distances (Å) for complex **2**  
 ([ $(\text{Me}_2\text{N})_2\text{Zr}(\text{OCMe}_2\text{CH}_2\text{NMe}_2)_2$ ]).

| Bond angles and lengths |            |            |            |
|-------------------------|------------|------------|------------|
| O(2)-Zr(1)-O(1)         | 101.96(7)  | Zr(1)-O(2) | 2.0337(17) |
| O(2)-Zr(1)-N(3)         | 154.75(7)  | Zr(1)-O(1) | 2.0370(17) |
| O(1)-Zr(1)-N(3)         | 90.93(7)   | Zr(1)-N(3) | 2.1192(19) |
| O(2)-Zr(1)-N(4)         | 89.58(8)   | Zr(1)-N(4) | 2.125(2)   |
| O(1)-Zr(1)-N(4)         | 154.61(8)  | Zr(1)-N(1) | 2.414(2)   |
| N(3)-Zr(1)-N(4)         | 87.65(8)   | Zr(1)-N(2) | 2.418(2)   |
| O(2)-Zr(1)-N(1)         | 90.69(7)   |            |            |
| O(1)-Zr(1)-N(1)         | 71.53(7)   |            |            |
| N(3)-Zr(1)-N(1)         | 114.11(7)  |            |            |
| N(4)-Zr(1)-N(1)         | 85.95(7)   |            |            |
| O(2)-Zr(1)-N(2)         | 71.98(7)   |            |            |
| O(1)-Zr(1)-N(2)         | 89.01(7)   |            |            |
| N(3)-Zr(1)-N(2)         | 86.82(7)   |            |            |
| N(4)-Zr(1)-N(2)         | 116.19(7)  |            |            |
| N(1)-Zr(1)-N(2)         | 150.93(7)  |            |            |
| C(1)-O(1)-Zr(1)         | 130.05(15) |            |            |
| C(7)-O(2)-Zr(1)         | 129.75(15) |            |            |
| C(14)-N(3)-Zr(1)        | 126.39(15) |            |            |
| C(13)-N(3)-Zr(1)        | 124.48(16) |            |            |
| C(16)-N(4)-C(15)        | 108.2(2)   |            |            |
| C(16)-N(4)-Zr(1)        | 125.67(16) |            |            |
| C(15)-N(4)-Zr(1)        | 125.59(17) |            |            |
| C(10)-N(2)-Zr(1)        | 105.75(14) |            |            |
